# Supplementary material for: Cryo-EM structure of the mature and infective Mayaro virus at 4.4 Å resolution reveals features of arthritogenic alphaviruses
Source: PubMed Central journal article supplement (PMC8144435; doi:10.1038/s41467-021-23400-9), 2021-05-24
Supplement: 41467_2021_23400_MOESM2_ESM.pdf [file 41467_2021_23400_MOESM2_ESM.pdf]

# Cryo-EM structure of the mature and infective Mayaro virus at 4.4 Å resolution reveals features of arthritogenic alphaviruses

## SUPPLEMENTARY INFORMATION

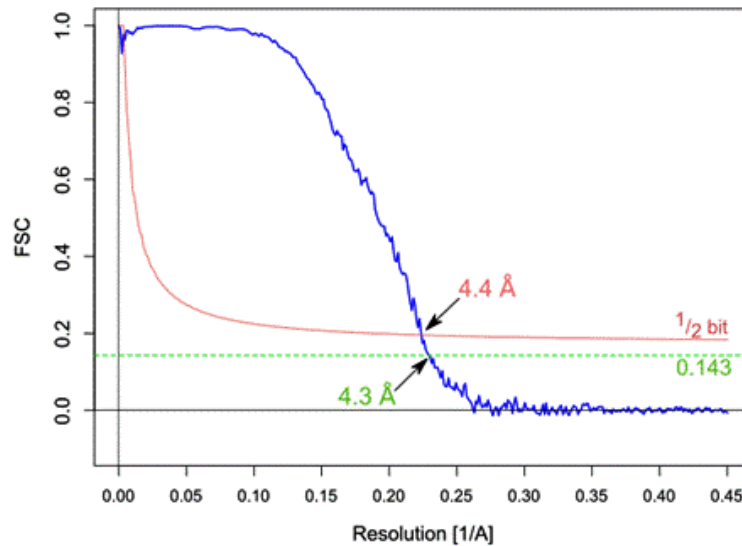

**Supplementary Fig. 1. Fourier shell correlation profile of MAYV Cryo-EM density map.** FSC curve calculated from two MAYV 3D volumes is shown in blue, the  $\frac{1}{2}$ -bit curve in red and the 0.143 crossing line in green. The global resolution determined based on the  $\frac{1}{2}$ -bit or 0.143 criterion is indicated<sup>60</sup>.

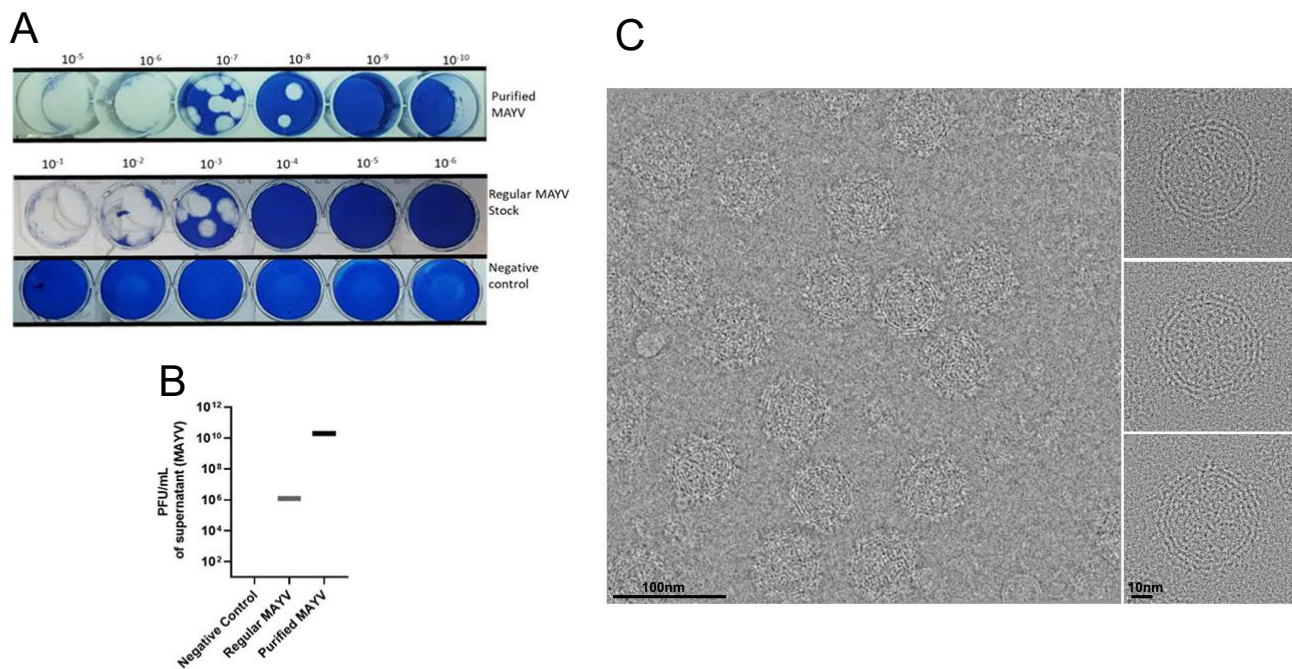

**Supplementary Fig. 2. Purified MAYV stocks used in Cryo-EM experiments are viable and infective.** (A) Representative pictures of plaque assays performed in Vero CCL81 cells to assess infective MAYV load in stock samples. Viable Vero CCL81 cells were stained in Methylene Blue 1% w/v. MAYV replication leads to cell death, creating transparent lysis plaques in the blue Vero CCL81 monolayer. (B) Viral load of stocks used in Cryo-EM experiments, before and after the purification process. (C) An example of MAYV Cryo-EM micrograph from set of 8792 movie stacks. The micrograph was processed by applying a band-pass filter in Imagic software to suppress very low-frequency information (less than 0.02 of Nyquist frequency), removing ramps of background fluctuations, and to suppress very high-frequency information (higher than 0.4 of Nyquist frequency), allowing a better visualization of low frequency content. After filtering, we resized the micrograph to 512x512 dimensions. Inset presents individually raw picked particles used in 3D reconstruction.

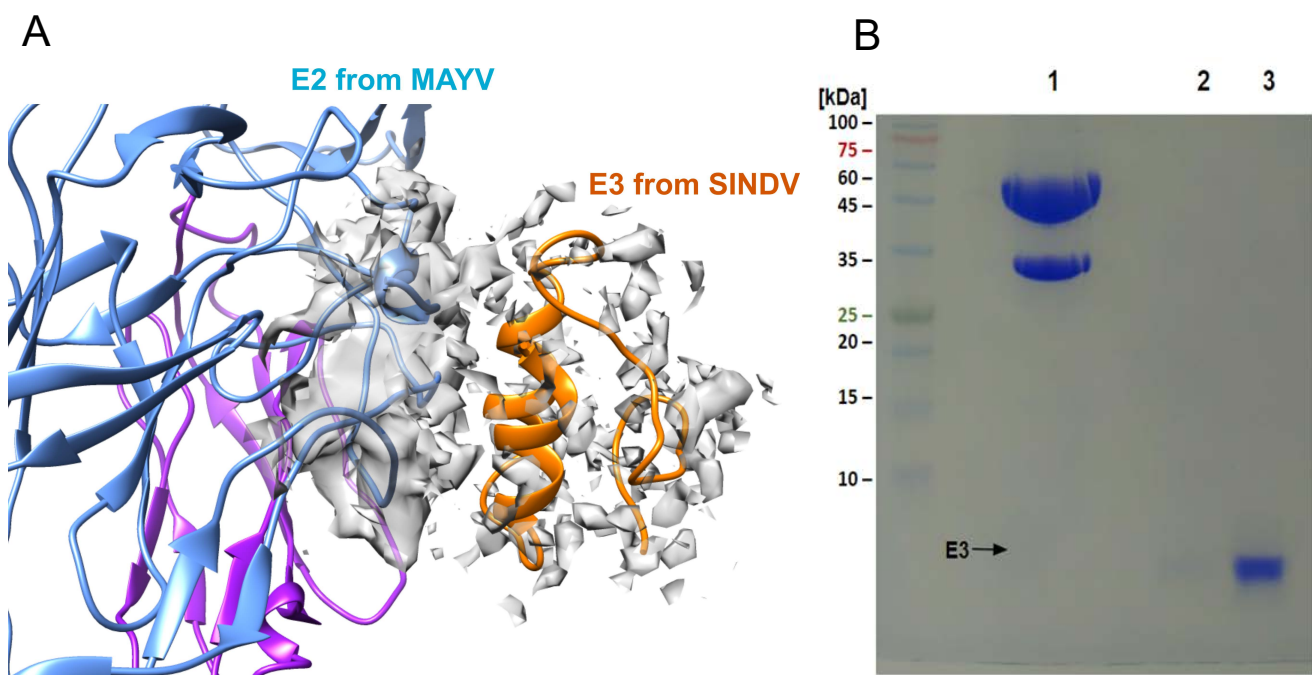

**Supplementary Fig. 3. Absence of the E3 protein indicates that purified MAYV samples are composed of mature virions.** (A) Superposition of the MAYV electron density with the SINDV particle cryo-EM structure (entry 6IMM). The SINDV E3 protein is shown in orange. MAYV electron density is shown in grey contoured at 2.0 sigma-level. (B) Analysis of purified MAYV in 15% SDS-PAGE gel, stained with Coomassie brilliant blue. Lane 1 is carried with 30 µg of denatured purified MAYV and shows no visible bands compatible with E3 protein size (7 kDa). Lanes 2 and 3 are carried with 1 µg and 9 µg of a 5 kDa synthetic peptide, used as a positive control. This gel is representative of 7 experiments with similar results.

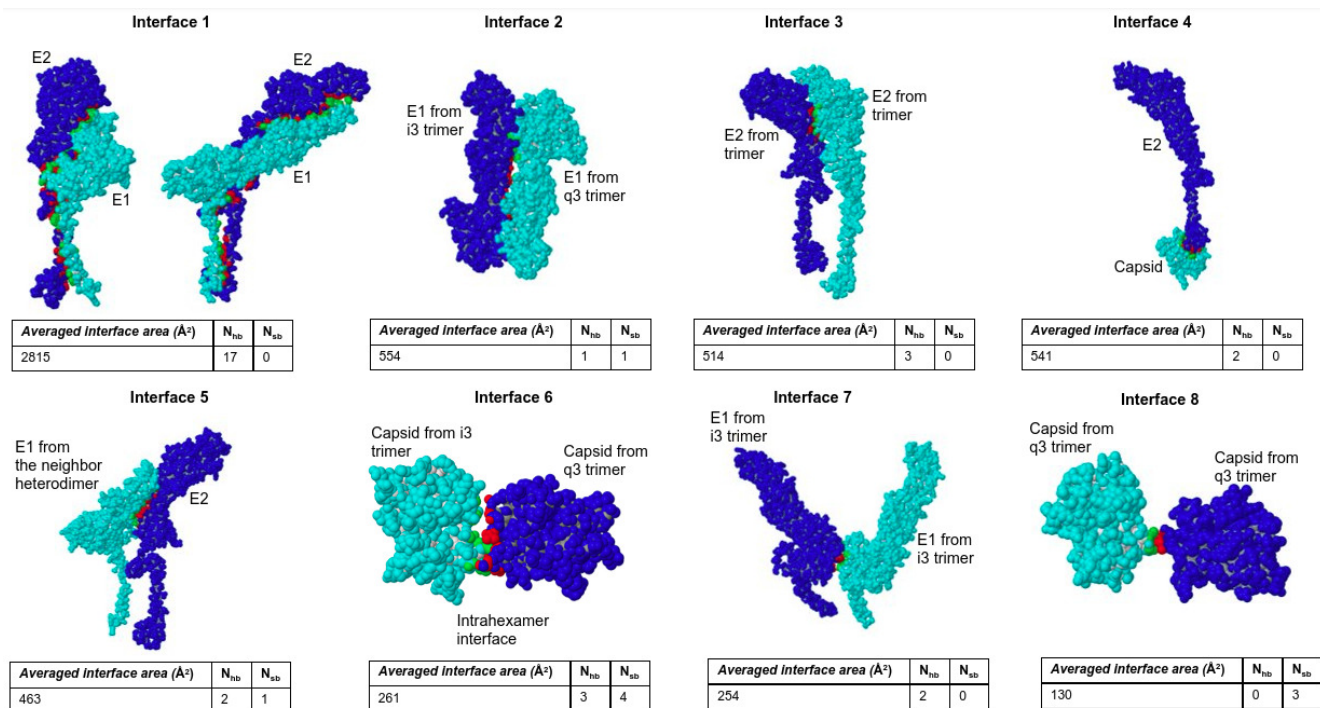

**Supplementary Fig. 4. List of the main interfaces among MAYV structural proteins of the asymmetric unit.** The interfaces were identified using the PDBEPIA server ([https://www.ebi.ac.uk/pdbe/prot\\_int/pistart.html](https://www.ebi.ac.uk/pdbe/prot_int/pistart.html)). Only interfaces with area larger than 100 Å were considered. The structures are rendered as spacefill and the interaction partners are colored in blue or cyan. Interaction residues are colored in red or green. N<sub>hb</sub> and N<sub>sb</sub> represent the average number of hydrogen bonds and salt-bridges in each interface, respectively.







## B - Multiple Sequence Alignment of the Alphaviral E1

```
1      10      20      30      40      50      60      70      80
MAYV  YEH TAV IPN QVGF F YKA HVARE GYS PLT LQMQVVE T SLE PTLNLEY ITC DYKT KVPSPY VKCCG TAE CRT QD KPEYK CAV
CHIKV YEH VTV IPN TVGVP F YKTLVNRPGYS PMV LEMELL SVT LEP TLSLDY ITC EYKT VVPSPY VKCCG TAE CKDKN LPDYS CKV
SFV   YEH STV MPN TVVGF F YKAHIERP GYS PLT LQMQVVE T SLE PTLNLEY ITC EYKT VVPSPY VKCCG TAE CSTKE KPDYQ CKV
RRV   YEH TAT IPN VVGF F YKAHIERNGFSPMT LQLEVVET SWEP TLNLEY ITC EYKT VVPSPY VKCCG TAE CSSTKE QPDYQ CKV
SINDV YEH ATT VNP VQPI F YKALVERAGYAPLN LEITVMS SEVLP STNQEY ITC KFT TVVSPK IKCCG SLE CQ PAA HADYT CKV
VEEV  YEH ATT MFS QAG I S YNT I VNRAGYAPLP LISITPTK IKLI PTVNLEY ITC HYKT GMDSPA IKCCG SQE CPT YRHPDEQ CKV
EEEV  YEH TAV MPN KVIG F YKALVERP GYAPLV H LQIQLVN TRI I PSTNLEY ITC KYKT KVPSPY VKCCG TAE CTSK P HPDYQ CQV
```

```
90     100     110     120     130     140     150
MAYV  FTGVYPFMWGGAY CFCDS ENTOMSEAY VERADV CKH DYA AAYRAHTASIR AKIKV TYGTVN .Q TVEAYVNGD HAVTI AGT
CHIKV FTGVYPFMWGGAY CFCDA ENTOLSEAH VEKESV CKT EFA SAYRAHTASAS AKLRV LYQGN .I TVTAYANGD HAVTV KDA
SFV   YTGVPFMWGGAY CFCDS ENTOLSEAY VDRSDV CRH DHA SAYKAHTASIR AKAVR VMYGNV .Q TVDVVNGD HAVTI GGT
RRV   YTGVPFMWGGAY CFCDS ENTOLSEAY VDRSDV CKH DHA SAYKAHTASIR AKATIRISYGTIN .Q TTEAFVNGE HAVNV GGS
SINDV FGGVYPFMWGGAY CFCDS ENTOMSEAY VELSDA CAS DHA QAIKVHTAAMKV GLRIVYGNIT .S FLDVVNGV TPGT SKDL
VEEV  FTGVYPFMWGGAY CFCDT ENTQVSKAY VMKSDD CLA DHA EAYKAHTASV QAF LNI TVGEHS .I VTTVYVNGE TP VNFNGV
EEEV  FTGVYPFMWGGAY CFCDT ENTOMSEAY VERSEH CS I DHA KAYKVHT GTVQAMVNI TYGSV TWR SADVYVNGE TP ANI GDA
```

```
160    170    180    190    200    210    220    230
MAYV  KFI F GPV STAWT PFD TKI VVYK GEVY NODF P YGAG QPGR FGD I OSRTLD SKD LYANT GLKL ARP AAGNI HV PPTQ T P SG
CHIKV KFI F GPM SSAWT PFD NKI VVYK GDVY NMDY P F GAG QPGR FGD I OSRTPE SKD VYANT QLV LQR P AAGTV HV PYSQ T P SG
SFV   QFI F GPL SSAWT PFD NKI VVYK D EFN DDF P YGSG QPGR FGD I OSRTVE SKD LYANT ALKL ARP SPGMV HV PPTQ T P SG
RRV   KFI F GPI STAWT PFD NKI VVYK D DVY NODF P YGSG QPGR FGD I OSRTVE SKD LYANT ALKL SRP SPGV HV PPTQ T P SG
SINDV KVI A GPI SASF T PFD HKVVI HRGLVY NYDF P YGAM KPGA FGD I OATSLT SKD LIAS TDIR LLKPS AKNV HV PPTQ A SSG
VEEV  KITI A GPL STAWT PFD R KIVQYAGEIY NYDF P YGAG QPGA FGD I OSRTV SSSDLYANT NLV LQR PKAGAHV PPTQ A P SG
EEEV  KLI I GPL S SAWS PFD NKI VVYK HGEVY NYDF P YGTG KAGS FGD I OSRTST SNDLYANT NLKL QR P QAGI VHP PPTQ A P SG
```

```
240    250    260    270    280    290    300    310
MAYV  FKT WQ KDR D SFLN AK APFGC TIQ TNPVRAMNCAVGNIPVSM DIADSAFTRIT DAP I ISEL LCTV S TCTH S SDFGGVAVLS
CHIKV FKY WL KERGAS LQHT APFGC QIATNPVRAMNCAVGNIPVSM DIADDAFTRIVVDAP SLTDM S CEV PACTH S SDFGGVA I I K
SFV   FYKYN KNGDCS VHS HSNVATLQEATAKVKTAGK VTLHFSTASAS P S FV VSI CSARATCSAS CEPPK DHI V YPASHN T LGV
RRV   FKY WL KEKGS LNTK APFGC KIK TNPVRAMNCAVGSIPVSM DIPDS AFTRIVVDAP AVTDLS CQV VVCTH S SDFGGVATLS
SINDV FEMWKNN SGR LQET APFGC K IAVNPLRAVD CSYGNIPVSM DIPNA AFTRITSDAPLVSTV KCEVSECTIY SADF GGMATLQ
VEEV  FEQWK KDKAPSLKFT APFGC E IY TNP IRAENCAVGSIP LAFDIPDALEFTRVSETP TLSAAECTLNE CVYSSDFGGIATVK
EEEV  FERWK RDKGAP LNDV APFGC S IALEPLRPENCAVGSIPVSM DIADDAFTRISETP T VSDLECK I T BCTYASDFGGIATLP
```

```
320    330    340    350    360    370    380    390
MAYV  YKVE KA GR CD VHS HSNVAVLQE . . V S TEA EGR SVI HFSTASASA P S F I VSV CS SRATCTAK CEPPK DHI V YPANHN G I T L
CHIKV YAVS KK GK CAVH SMTNAV TIR EAE I E VEGNSQLQIS FSTALASAEFRVQVCS TQVHCAAE CHPPK DHI V NYPASHT T LGV
SFV   YKTN KNGDCS VHS HSNVATLQEATAKVKTAGK VTLHFSTASAS P S FV VSI CSARATCSAS CEPPK DHI V YPASHN V V F
RRV   YKTD KP GK CAVH SSNVATLQEATVDV KEDGK VIVHFSTASASA PAFK VSV CDAKT TCTAA CEPPK DHI V YGASHN N QV F
SINDV YVSD REGQC P VHS HSNATLQESTVHVLEK GAVTVHFSTAS P QANF I VSI CGKKT T CNAE CKPPADHI V S T P HKN D Q E F Q
VEEV  YSASKS GKCAVHVPSGTATLKEAAVELTEQGSAT I HFSTANIHP EFR LQICTSYVTCKGD CHPPK DHI V THPQYHAQ T FT
EEEV  TNPV KQETVQ FIVHQV LQLL KRM T S P L RAGS FTFHFSTANIHP AFKLOVCTSGITCKGD CKPPK DHI V D YPAQHT E SFT
```

```
400    410    420    430
MAYV  PDLS S T AM TWAQH LA GGV G LLI ALA VLILVIV TC. . ITLR R. .
CHIKV QDIS ATAM S VVQKIT GGV G LVVAV ALILIVV LC. . VSFSR H. .
SFV   PDM SGTAL S VQKISS GGLGAF AIGAILLVVV TC. . IGLRR. .
RRV   PDM SGTAM T WQRLAS GGLG LALI AVVVLVIV TC. . ITMR R. .
SINDV AAISK T S W S W L F A L F G G A S L L I I G L M I F A C S M M. . L T S T R R. .
VEEV  AA V S K T A W T W L T S L L G G S A V I I I I G L V L A T I V A M Y V L T N Q K H N
EEEV  SA I S A T A W S W L K V L V G G T S A F I V L G L I A T A V V A L . V L F F H R H .
```



## C - Multiple Sequence Alignment of the Alphaviral E2

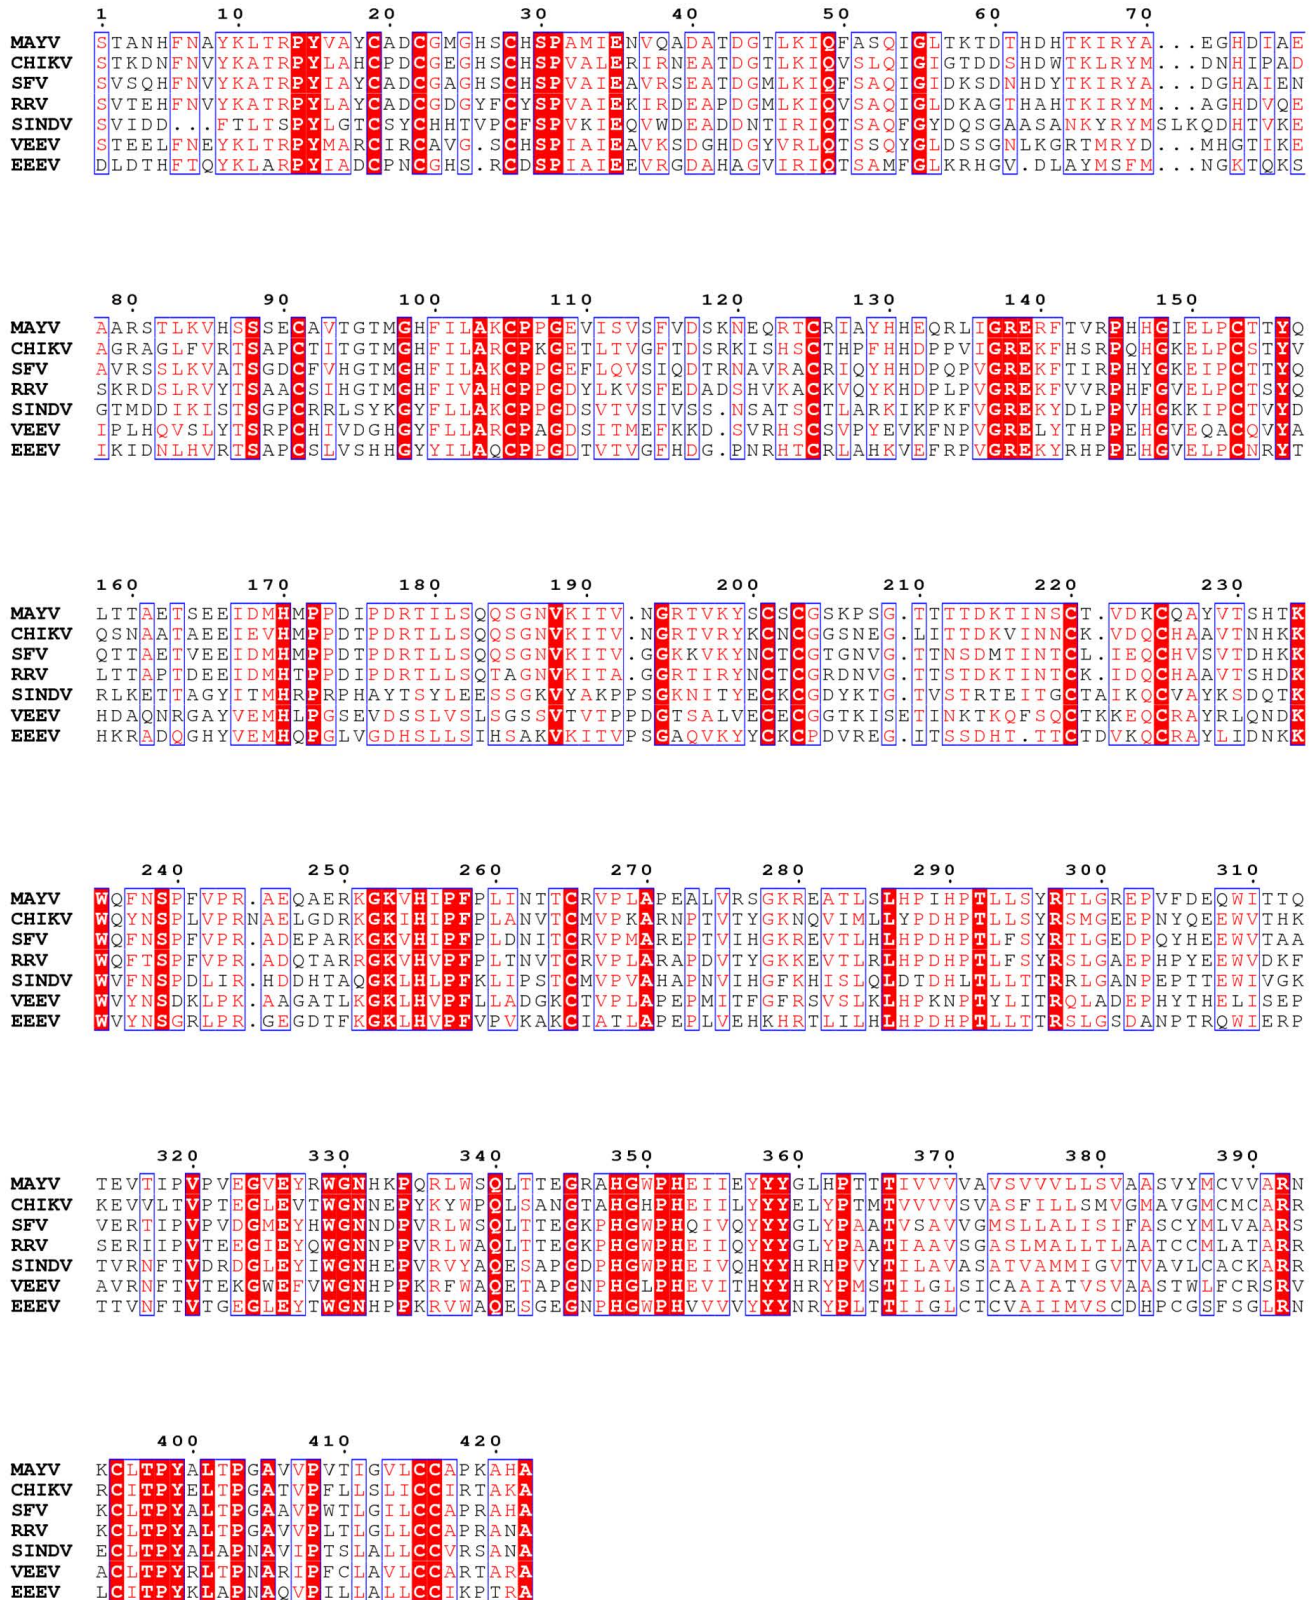

Supplementary Fig. 5. Multiple sequence alignment of alphaviruses structural proteins. The alignments were performed for proteins C (A), E1 (B) and E2 (C) using the Muscle Algorithm in EBI server (<https://www.ebi.ac.uk/Tools/msa/muscle/>) and visualized with ESPrnt version 3.0 server.

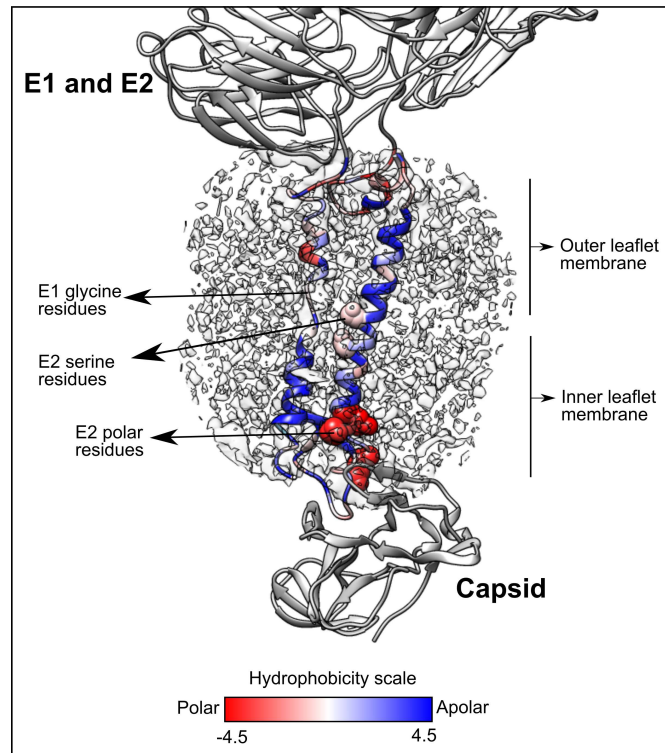

**Supplementary Fig. 6. MAYV E1 and E2 transmembrane domains. Overall view of E1 and E2 TM domains inserted into the lipid membrane.** The 3D atomic model is colored by hydrophobicity using Kyte-Doolittle scale. Important arginine and lysine residues in E2 are highlighted in spheres, as well as glycine (E1) and serine (E2) residues. The electron density is shown in grey surface.

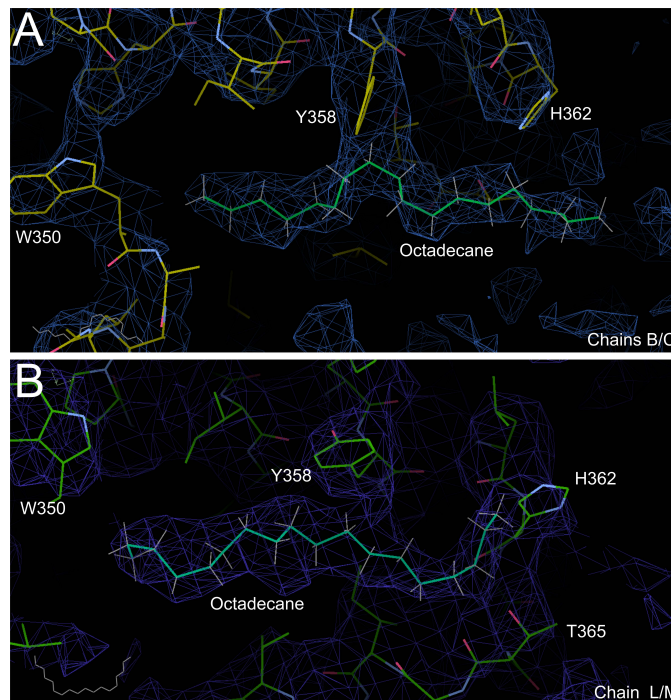

**Supplementary Fig. 7. 3D model fitting of a C18 hydrocarbon (Octadecane) in the extra density from two MAYV E1-E2 heterodimers (chains B/C and chains L/M).** Octadecane was built and fitted into the density map using Coot. The density map was rendered at 2.5 sigma contour level.

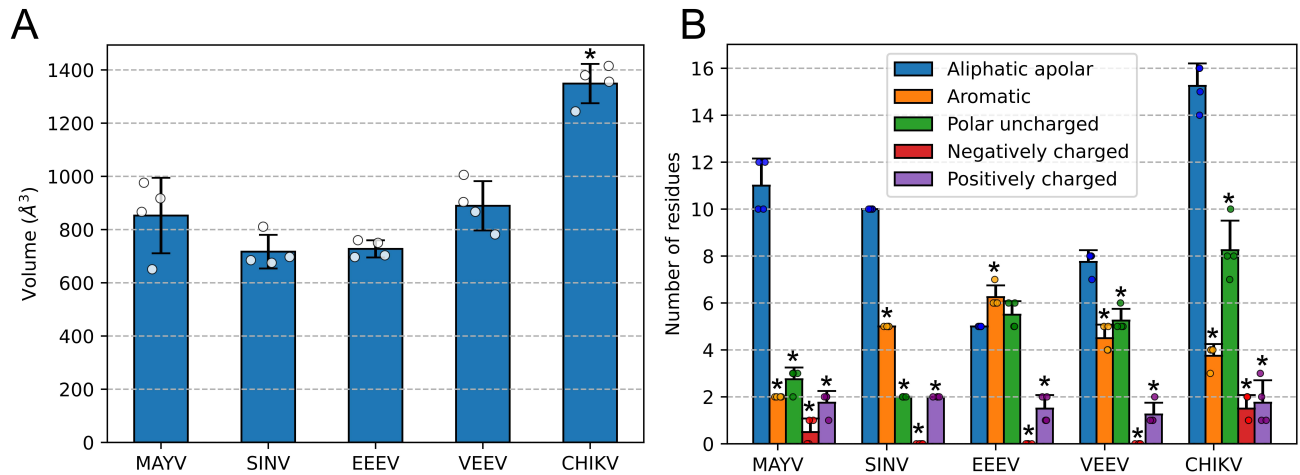

**Supplementary Fig. 8. Structural features extracted from the cavity between E1 and E2 TM helices in MAYV and other alphaviruses. (A)** Cavity volume estimated for the four E1-E2 heterodimers ( $n = 4$  independent heterodimer structures) in asymmetric unit. One-way ANOVA with Tukey's multiple comparison test was used for comparing MAYV cavity volume with other alphaviruses (\* indicates adj.  $p < 0.01$  when comparing the alphaviruses to MAYV). **(B)** Number of residues in each four E1-E2 heterodimers ( $n = 4$  independent heterodimer structures) in asymmetric unit separated by classes. One-way ANOVA with Tukey's multiple comparison test was used for comparing the number of residues in aliphatic apolar class with the other classes in the same alphavirus species (\* indicates adj.  $p < 0.01$  when comparing the aliphatic apolar class with the other classes). All data are presented as mean values  $\pm$  SD. Aliphatic apolar: ALA, VAL, ILE, LEU, GLY, PRO; Aromatic: PHE, TYR, TRP; Polar uncharged: SER, THR, CYS, MET, ASN, GLN; Negatively charged: GLU, ASP; Positively charged: ARG, LYS, HIS.

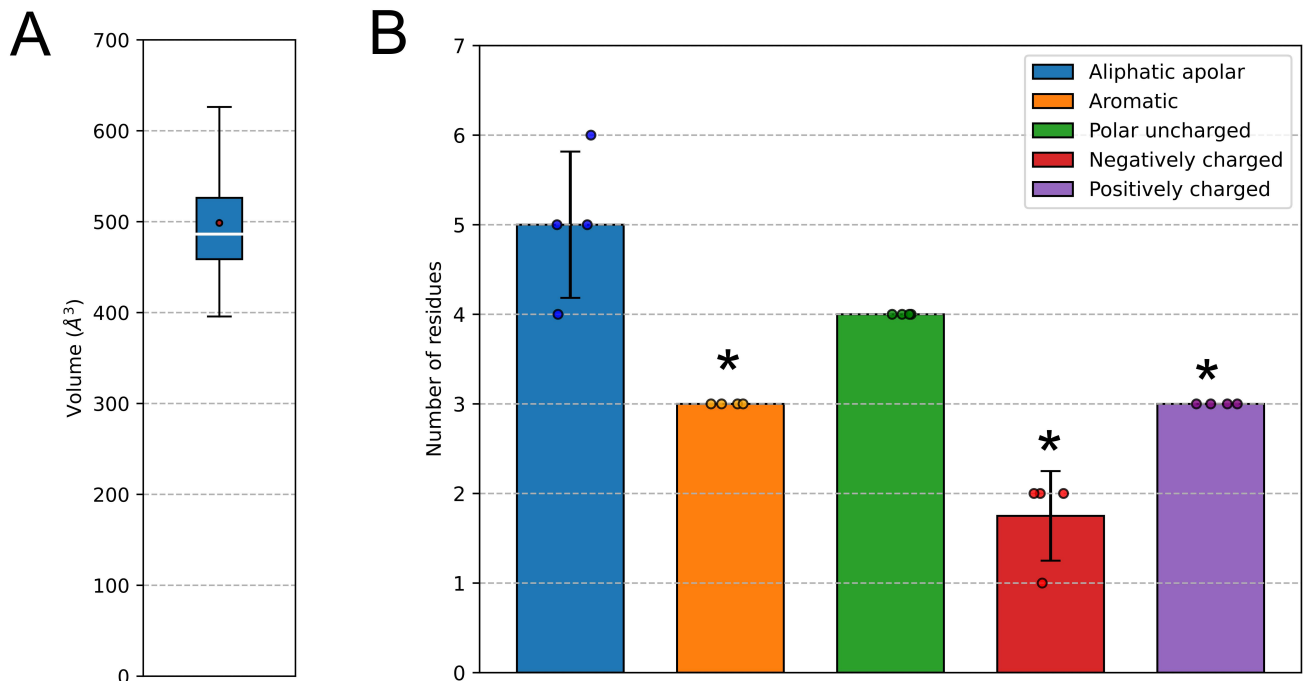

**Supplementary Fig. 9. Structural features extracted from the C-protein cavity that binds to E2 C-terminal. (A)** Boxplot of cavity volume estimated for the four capsids ( $n = 4$  independent capsids structures) in asymmetric unit. In the boxplot, the box portion defines the interquartile range (IQR) (67.5 Å<sup>3</sup>) and the 75th (Q3) (526.2 Å<sup>3</sup>) and 25th (Q1) (458.7 Å<sup>3</sup>) percentiles. The central line indicates the median (486.3 Å<sup>3</sup>) and the mean (498.6 Å<sup>3</sup>) is indicated by a dot. The whiskers with minimum (395.7 Å<sup>3</sup>) and maximum (626.2 Å<sup>3</sup>) are determined using  $Q1 - 1.5 \times IQR$  and  $Q3 + 1.5 \times IQR$ , respectively. **(B)** Number of residues in each four capsids ( $n = 4$  independent capsids structures) in asymmetric unit separated by classes. One-way ANOVA with Tukey's multiple comparison test was used for comparing the number of residues in aliphatic apolar class with the other classes (\* indicates adj.  $p < 0.01$  when comparing the aliphatic apolar class with the other classes) All data are presented as mean values  $\pm$  SD. Aliphatic apolar: ALA, VAL, ILE, LEU, GLY, PRO; Aromatic: PHE, TYR, TRP; Polar uncharged: SER, THR, CYS, MET, ASN, GLN; Negatively charged: GLU, ASP; Positively charged: ARG, LYS, HIS.



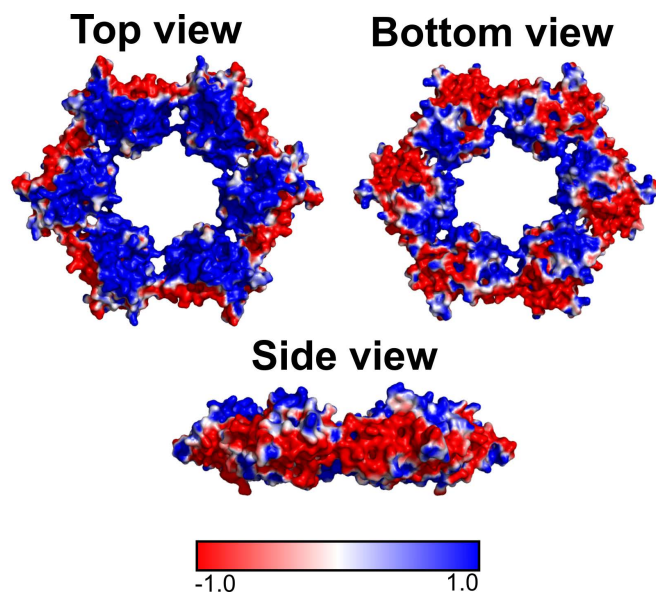

**Supplementary Fig. 10. The electrostatic potential of at the surface of MAYV capsid proteins.** The electrostatic potential was calculated using ABPS and visualized in Pymol. Top, bottom and side view from capsid hexameric organization is shown. Charges are presented in a gradient of blue (positive) to red (negative), white being neutral local charge.

**A**

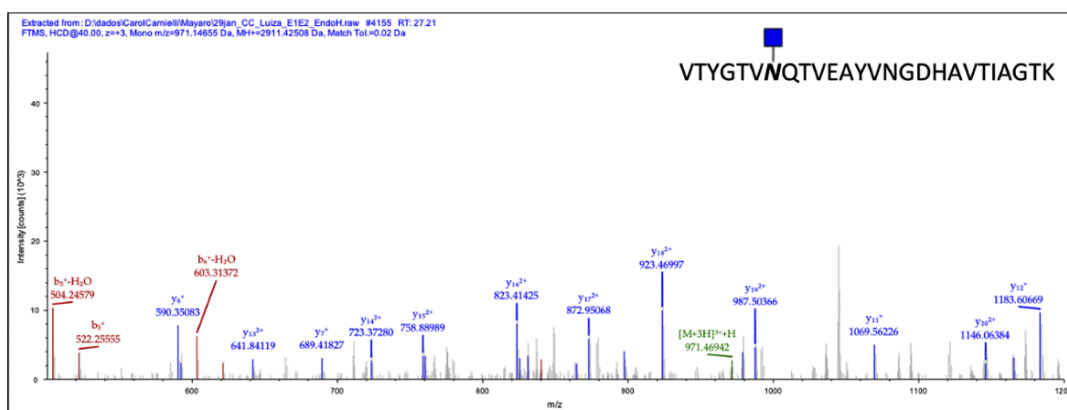

**B**

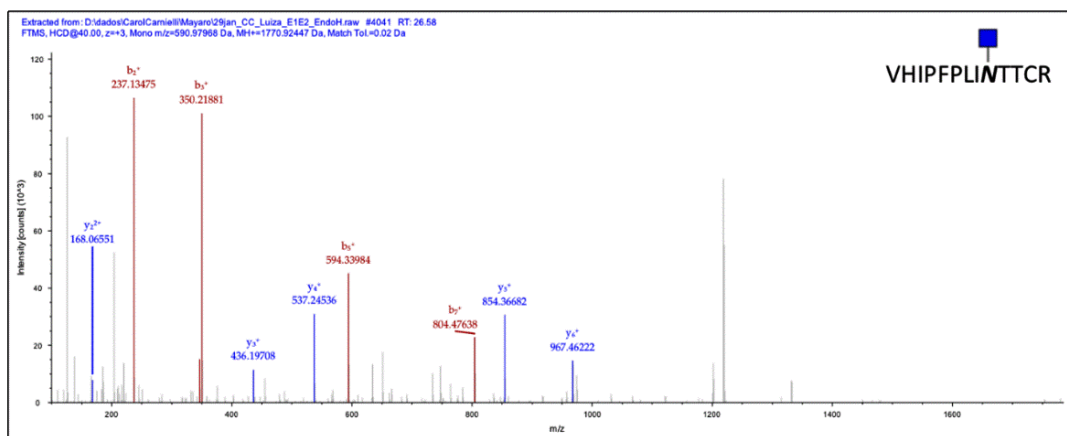

**Supplementary Fig. 11. Spectra of identified peptides, after Endo H and trypsin digestions, annotated by Proteome Discoverer and manually verified.** (A) Spectrum of the peptide VTYGTVNQTV EAYVNGDHAVTIAGTK (m/z 971.14655, +3) from E1 protein with the N-acetylglucosamine in N141 residue, and (B) VHIPPFLINTTCR (m/z 590.97968, +3) E2 peptide with the N-acetylglucosamine in the N262 residue. The blue square represents the N-Acetyl-D-Glucosamine monosaccharide.



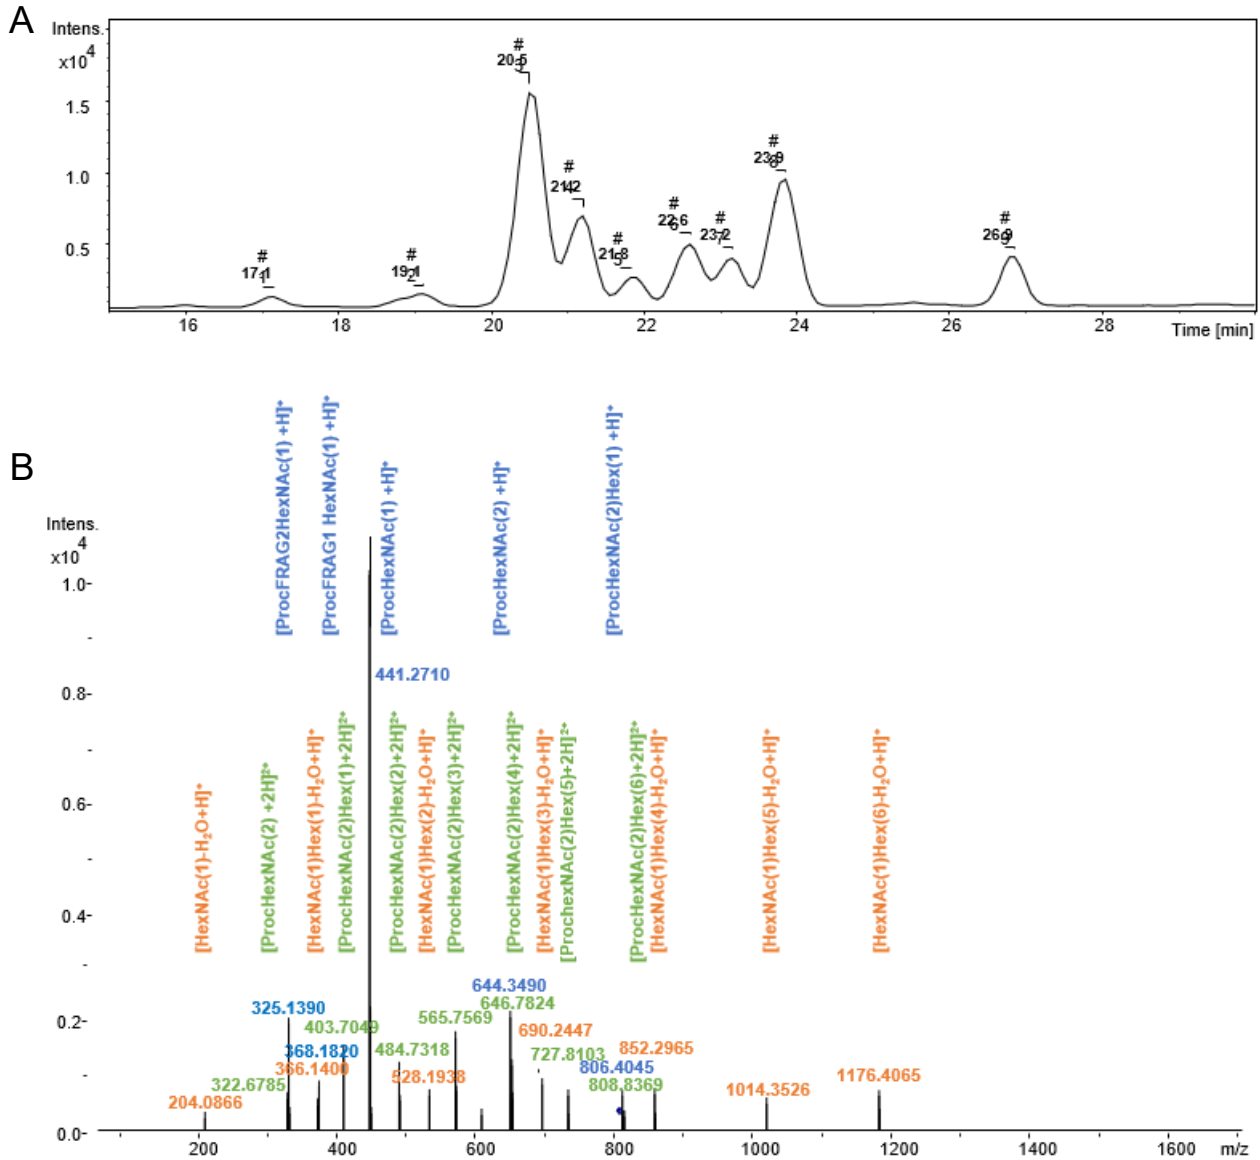

**Supplementary Fig. 12. Base peak chromatogram derived from UPLC-MS/MS analyses of N-glycans released from E1/E2 glycoproteins of MAYV and glycan composition interpretation based on MS2 data. (A)** Nine peaks were integrated (#1 to #9) and characterized as N-glycans composed by N-acetyl hexosamine (HexNAc); hexose (Hex) and fucose (Fuc) - HexNAc(2-5)Hex(5-8)Fuc(0-1). These glycan were proposed based on MS1 isotopic pattern (presence of double and triple charge forms in a variation of adducts) and respective carbohydrate unit compositions were proposed based on MS2 fragmentation pattern, as exemplified for peak #3 in (B). **(B)** MS2 (fragmentation) spectrum of m/z 808.8387, the most intense MS1 peak detected in the chromatographic peak #3. Through the interpretation of different MS1 peaks, according to the isotopic pattern for double and triple charge and also the variation of adducts (please see Supplementary Table 5 or details), the m/z 808.8387 was identified as [M+2H]<sup>2+</sup>, thus representing a glycan of 1,615.6597 Da composed by HexNAc(2)Hex(6). In the fragmentation spectrum, it was possible to recognize neutral losses of 162.05 (relative to hexose residues) and 203.07 (N-acetyl-hexosamine residues), in addition to fragments corresponding to procainamide derivatives (orange and blue sequence paths, respectively). Furthermore, MS2 double charge peaks fragmentation sequence (green) allowed for the visualization of losses of 81.02 (another way to verify the presence of the hexose units). For the other six chromatogram peaks (peaks #4 to #9), the same rational was used to investigate the fragmentation pattern and to attribute the respective compositions of the glycans (Figure 4D). For peaks #1 and #2, it composition was predicted mainly using MS1 data, due to the poor fragmentation in the MS2 data. All N-glycans compositions were confirmed using Glycoworkbench software and data was deposited at UniCarb-DB.

**Supplementary Table 1. Identity between structural proteins from MAYV and other alphaviruses.**

|                                             | <b>CHIKV strain S27</b> | <b>SFV</b>  | <b>RRV strain T48</b> | <b>SINDV</b> | <b>EEEV strain Florida 91-469</b> | <b>VEEV strain TC-83</b> |
|---------------------------------------------|-------------------------|-------------|-----------------------|--------------|-----------------------------------|--------------------------|
| <b>Capsid – disorder N-terminal (1-102)</b> | <b>53 %</b>             | <b>56 %</b> | <b>63 %</b>           | <b>43 %</b>  | <b>33 %</b>                       | <b>37 %</b>              |
| <b>Capsid - Structured domain (103-258)</b> | <b>89 %</b>             | <b>90 %</b> | <b>90 %</b>           | <b>65 %</b>  | <b>63 %</b>                       | <b>64 %</b>              |
| <b>E1</b>                                   | <b>62 %</b>             | <b>72 %</b> | <b>71 %</b>           | <b>48 %</b>  | <b>52 %</b>                       | <b>52 %</b>              |
| <b>E2</b>                                   | <b>56 %</b>             | <b>67 %</b> | <b>62 %</b>           | <b>37 %</b>  | <b>41 %</b>                       | <b>38 %</b>              |

**Supplementary Table 2. Cryo-EM data collection and processing.**

|                                                                      |                                                      |
|----------------------------------------------------------------------|------------------------------------------------------|
| <b>Magnification (x)</b>                                             | <b>59,000</b>                                        |
| <b>Voltage (kV)</b>                                                  | <b>300</b>                                           |
| <b>Electron exposure (e- Å<sup>-2</sup>)</b>                         | <b>30</b>                                            |
| <b>Nominal defocus (µm)</b>                                          | <b>-1.5</b>                                          |
| <b>Pixel size (Å)</b>                                                | <b>1.1074</b>                                        |
| <b>Symmetry imposed</b>                                              | <b>Icosahedral</b>                                   |
| <b>Number of micrographs</b>                                         | <b>175840 (8792 movie stacks)</b>                    |
| <b>Initial number of particles images</b>                            | <b>79000</b>                                         |
| <b>Number of particle images used in the final 3D reconstruction</b> | <b>40179</b>                                         |
| <b>Map global resolution</b>                                         | <b>4.4 (1/2-bit threshold) 4.3 (0.143 threshold)</b> |



**Supplementary Table 3. Overall MAYV 3D atomic model quality evaluated by MolProbity.**

| <b>Structural composition</b>                    |            |
|--------------------------------------------------|------------|
| <b>Chains</b>                                    | 12         |
| <b>Residues</b>                                  | 4004       |
| <b>MolProbity statistics</b>                     |            |
| <b>Bonds length (Å) (RMSD - # &gt; 4 sigmas)</b> | 0.006 (0)  |
| <b>Bond angles (°) (RMSD - # &gt; 4 sigmas)</b>  | 1.070 (43) |
| <b>MolProbity score</b>                          | 2.0        |
| <b>Clash score</b>                               | 8.7        |
| <b>Ramachandran plot (%)</b>                     |            |
| <b>Outliers</b>                                  | 0.1        |
| <b>Allowed</b>                                   | 11.4       |
| <b>Favored</b>                                   | 88.6       |
| <b>Rotamer outliers (%)</b>                      | 0.59       |
| <b>C<math>\beta</math> outliers (%)</b>          | 0          |
| <b>Model vs. Data</b>                            |            |
| <b>CC (mask)</b>                                 | 0.69       |

**Supplementary Table 4. List of alphaviruses PDB files and Cryo-EM maps used for comparative studies.**

| <b>Alphavirus</b>      | <b>PDB ID</b> | <b>EMD ID</b> | <b>Method</b> | <b>Resolution</b> | <b>Reference</b> |
|------------------------|---------------|---------------|---------------|-------------------|------------------|
| CHIKV                  | 6NK5, 6NK6    | 9393          | Cryo-EM       | ~4.5 Å            | Basore, 2019     |
| SINDV (only E1 and E2) | 6IMM          | 9693          | Cryo-EM       | ~3.5 Å            | Chen, 2018       |
| VEEV                   | 3J0C          | 5275          | Cryo-EM       | ~4.4 Å            | Zhang, 2011      |
| EEEV                   | 6MX4          | 9280          | Cryo-EM       | ~4.4 Å            | Hasan, 2018      |

**Supplementary Table 5. Summary of MS<sup>1</sup> analyses of N-glycans released from E1/E2 MAYV and identified by UPLC-MS/MS analyses.** The nine chromatographic peaks are presented with featured MS<sup>1</sup> variations (double and triple charge and adducts). The glycan composition was proposed in combination with MS<sup>2</sup> data.

| Peaks | RT (min) | Peak Area | [M+2H] <sup>2+</sup> | [M+HK] <sup>2+</sup> | [M+2K] <sup>2+</sup> | [M+3H] <sup>3+</sup> | [M+2HK] <sup>3+</sup> | [M+2KH] <sup>3+</sup> | [M+3K] <sup>3+</sup> | M <sup>a</sup> | Proposed Composition <sup>b</sup> |
|-------|----------|-----------|----------------------|----------------------|----------------------|----------------------|-----------------------|-----------------------|----------------------|----------------|-----------------------------------|
| #1    | 17.1     | 14739     | 727.8114             | 746.7888             | ND                   | ND                   | ND                    | ND                    | ND                   | 1453.6066      | HexNAc(2)Hex(5)                   |
| #2    | 19.1     | 25597     | 829.3501             | 848.3246             | ND                   | ND                   | 565.8864              | 578.5398              | ND                   | 1656.6851      | HexNAc(3)Hex(5)                   |
| #3    | 20.5     | 298547    | 808.8383             | 827.8154             | 846.7937             | ND                   | 552.213               | 564.8646              | ND                   | 1615.6597      | HexNAc(2)Hex(6)                   |
| #4    | 21.2     | 78873     | 930.8921             | 949.8696             | 968.8477             | 620.9288             | 633.5809              | 646.2322              | 658.8851             | 1859.7648      | HexNAc(4)Hex(5)                   |
| #5    | 21.8     | 25492     | 1032.4332            | 1051.4114            | ND                   | 688.622              | 701.2741              | 713.9259              | 726.5785             | 2062.8460      | HexNAc(5)Hex(5)                   |
| #6    | 22.6     | 60892     | 1003.9234            | 1022.9008            | 1041.8813            | 669.6158             | 682.2672              | 694.9192              | 707.5719             | 2005.8260      | HexNAc(4)Hex(5)Fuc(1)             |
| #7    | 23.2     | 27692     | 1105.4638            | 1124.4417            | ND                   | 737.3091             | 749.9607              | 762.6121              | 775.2670             | 2208.9063      | HexNAc(5)Hex(5)Fuc(1)             |
| #8    | 23.9     | 195538    | 889.8666             | 908.844              | 927.822              | ND                   | 606.2306              | 618.8828              | 631.5339             | 1777.7148      | HexNAc(2)Hex(7)                   |
| #9    | 26.9     | 76399     | 970.8955             | 989.8735             | 1008.8516            | ND                   | 660.2494              | 672.9011              | 685.5527             | 1939.7717      | HexNAc(2)Hex(8)                   |

<sup>a</sup>For N-glycans exact mass, it was considered the average of the most intense MS<sup>1</sup> peaks

<sup>b</sup>Derived from MS and MS<sup>2</sup> peak interpretation of N-glycans reacted with procainamide

ND - not detected
