# Supplementary material for: Cryo-EM structure of the mature and infective Mayaro virus at 4.4 Å resolution reveals features of arthritogenic alphaviruses
Source: PubMed Central journal article supplement (PMC8144435; doi:10.1038/s41467-021-23400-9), 2021-05-24
Supplement: 41467_2021_23400_MOESM3_ESM.pdf [file 41467_2021_23400_MOESM3_ESM.pdf]

## **Description of Additional Supplementary Files**

**Liquid chromatography-Mass spectrometry/ Mass spectrometry (LC-MS/MS) data analysis of MAYV proteins indicate N-glycosylated sites at positions N141 in E1 and N262 in E2.** Viral protein bands were separated in SDS-PAGE and digested with PNGaseF or EndoH. Digested proteins and a non-digested protein control were later digested with trypsin and analyzed at the mass spectrometer coupled to nanoflow liquid chromatography.

**Supplementary Data 1** - List of protein groups identified in samples digested with trypsin.

**Supplementary Data 2** - List of peptides identified in samples digested with trypsin.

**Supplementary Data 3** - List of protein groups identified in samples digested with PNGase F and trypsin.

**Supplementary Data 4** - List of peptides identified in samples digested with PNGase F and trypsin.

**Supplementary Data 5** - List of protein groups identified in samples digested with Endo H and trypsin.

**Supplementary Data 6** - List of peptides identified in samples digested with Endo H and trypsin.
